# Supplementary material
Source: PubMed Central journal article supplement (PMC1322268)
Supplement: nar_33_22_6961__2.pdf [file nar_33_22_6961__2.pdf]

Table S1. Chemical shifts (in p.p.m.) of the non-exchangeable proton and protonated carbon resonances of  $\psi_{32}$ -ACSL RNA hairpin.

| Residue         | H6/<br>H8 | H5/<br>H2 | H1'  | H2'  | H3'  | H4'  | H5'/<br>H5''  | C6/<br>C8         | C5/<br>C2 | C1'   | C2'   | C3'   | C4'   | C5'   |
|-----------------|-----------|-----------|------|------|------|------|---------------|-------------------|-----------|-------|-------|-------|-------|-------|
| G <sub>27</sub> | 7.99      | -         | 5.74 | 4.84 | 4.54 | 4.34 | 4.01,<br>3.89 | <sup>a</sup> n.a. | -         | n.a.  | n.a.  | n.a.  | n.a.  | n.a.  |
| G <sub>28</sub> | 7.47      | -         | 5.90 | 4.64 | 4.56 | 4.51 | 4.49,<br>4.19 | 136.74            | -         | 92.86 | 75.65 | 72.81 | 82.27 | 65.77 |
| G <sub>29</sub> | 7.17      | -         | 5.79 | 4.62 | 4.48 | 4.45 | 4.48,<br>4.06 | 135.98            | -         | 92.87 | 75.69 | 72.82 | 81.99 | 65.41 |
| G <sub>30</sub> | 7.10      | -         | 5.75 | 4.62 | 4.42 | 4.47 | 4.41,<br>4.03 | 136.17            |           | 93.12 | 75.53 | 73.14 | 82.23 | 66.05 |
| A <sub>31</sub> | 7.68      | 7.74      | 5.99 | 4.65 | 4.58 | 4.47 | 4.53,<br>4.08 | 139.63            | 154.26    | 93.15 | 75.69 | 72.56 | 82.09 | 64.86 |
| $\Psi_{32}$     | 6.92      | -         | 4.56 | 4.10 | 4.28 | 4.14 | 4.37,<br>3.94 | 140.05            |           | 82.78 | 75.16 | 73.65 | 79.91 | 65.33 |
| U <sub>33</sub> | 7.51      | 5.25      | 5.70 | 4.31 | 4.36 | 4.31 | 4.40,<br>4.02 | 141.49            | 103.83    | 93.29 | 76.23 | 73.25 | 82.86 | 65.02 |
| G <sub>34</sub> | 7.95      | -         | 5.49 | 4.70 | 4.56 | 4.39 | 4.15,<br>4.01 | 139.43            |           | 88.67 | 74.97 | 77.54 | 84.82 | 66.93 |
| A <sub>35</sub> | 8.09      | 8.01      | 5.49 | 4.35 | 4.56 | 3.69 | 3.77,<br>3.51 | 141.95            | 155.17    | 88.67 | 77.47 | 77.54 | 84.82 | 67.80 |
| A <sub>36</sub> | 7.88      | 7.91      | 5.72 | 4.74 | 4.81 | 4.44 | 4.10,<br>3.97 | 141.16            | 155.06    | 89.13 | 75.57 | 77.00 | 84.78 | 68.59 |
| A <sub>37</sub> | 8.18      | 7.19      | 5.76 | 4.80 | 4.65 | 4.59 | 4.35,<br>4.30 | 141.51            | 153.46    | 89.36 | 75.25 | 75.76 | 84.34 | 68.84 |
| A <sub>38</sub> | 7.77      | 7.86      | 5.75 | 4.41 | 4.36 | 4.56 | 4.33,<br>n.a. | 139.90            | 154.09    | 93.00 | 75.29 | 73.82 | 83.06 | 68.07 |
| U <sub>39</sub> | 7.61      | 4.92      | 5.46 | 4.29 | 4.41 | 4.39 | 4.51,<br>4.05 | 141.64            | 102.60    | 93.49 | 75.33 | 72.10 | 82.11 | 64.26 |
| C <sub>40</sub> | 7.88      | 5.54      | 5.58 | 4.27 | 4.45 | 4.40 | 4.49,<br>4.04 | 141.80            | 97.33     | 93.83 | 75.58 | 72.22 | 81.90 | 64.62 |
| C <sub>41</sub> | 7.79      | 5.43      | 5.43 | 4.34 | 4.45 | 4.37 | 4.52,<br>4.03 | 141.63            | 97.44     | 94.09 | 75.37 | 72.06 | 81.99 | 64.42 |
| C <sub>42</sub> | 7.80      | 5.45      | 5.46 | 4.24 | 4.47 | 4.35 | 4.53,<br>4.02 | 141.60            | 97.44     | 94.35 | 75.53 | 71.91 | 82.07 | 64.30 |
| C <sub>43</sub> | 7.66      | 7.83      | 5.71 | 3.98 | 4.15 | 4.14 | 4.46,<br>3.99 | 141.88            | 97.97     | 92.87 | 77.48 | 69.63 | 83.66 | 65.13 |

The <sup>1</sup>H chemical shifts were measured at 25 °C and pH 6.8 and are referenced relative to DSS (0.00 ppm) and the <sup>13</sup>C chemical shifts set using the spectrometer frequency and the <sup>1</sup>H and <sup>13</sup>C gyromagnetic ratios. The uncertainties in the chemical shift values are ≈0.01 and ≈0.05 p.p.m. for <sup>1</sup>H and <sup>13</sup>C, respectively. The 5' and 5'' protons are not stereospecifically assigned.

<sup>a</sup>Not assigned.

Table S2. Chemical shifts (ppm) of exchangeable proton, protonated nitrogen, and phosphorous resonances.

| Residue         | H1/H3             | N1/N3             | HN4/HN6<br>/HN2   | N4/N6/N2 | 5'-P  |
|-----------------|-------------------|-------------------|-------------------|----------|-------|
| G <sub>27</sub> | <sup>a</sup> n.o. | n.o.              | n.o.              | n.o.     | —     |
| G <sub>28</sub> | 12.70             | 144.80            | <sup>b</sup> n.a. | n.o.     | -3.88 |
| G <sub>29</sub> | 12.51             | 144.76            | n.a.              | n.o.     | -3.69 |
| G <sub>30</sub> | 12.27             | 144.30            | n.a.              | n.o.     | -3.68 |
| A <sub>31</sub> | -                 | -                 | 7.71, 6.51        | 80.13    | -4.01 |
| Ψ <sub>32</sub> | 10.31,<br>13.21   | 128.59,<br>158.17 | -                 | -        | -3.77 |
| U <sub>33</sub> | 13.21             | 157.98            | -                 | -        | -3.85 |
| G <sub>34</sub> | 10.49             | 143.16            | n.a.              | n.o.     | -3.86 |
| A <sub>35</sub> | —                 | -                 | <sup>c</sup> 6.42 | 75.71    | -3.31 |
| A <sub>36</sub> | —                 | -                 | <sup>c</sup> 6.61 | 76.90    | -3.99 |
| A <sub>37</sub> | -                 | -                 | n.a.              | n.a.     | -3.40 |
| A <sub>38</sub> | -                 | -                 | n.o.              | 80.05    | -3.38 |
| U <sub>39</sub> | 13.86             | 159.41            | -                 | -        | -4.63 |
| C <sub>40</sub> | -                 | 144.04            | 6.91, 8.39        | 95.65    | -4.42 |
| C <sub>41</sub> | -                 | 144.79            | 6.85, 8.42        | 95.27    | -4.45 |
| C <sub>42</sub> | -                 | 143.64            | 6.90, 8.40        | 95.29    | -4.42 |
| C <sub>43</sub> | —                 | —                 | 6.97, 8.23        | 94.14    | -4.24 |

The <sup>1</sup>H chemical shifts were referenced relative to DSS at 12 °C and pH 6.8 and the <sup>15</sup>N chemical shifts set using the spectrometer frequency and the <sup>1</sup>H and <sup>15</sup>N gyromagnetic ratios. The <sup>31</sup>P chemical shifts are reported relative to an external standard of TMP and were recorded at 25 °C. The chemical shifts have uncertainties of ≈0.01, ≈0.03, and ≈0.01 ppm for <sup>1</sup>H, <sup>15</sup>N, and <sup>31</sup>P, respectively.

<sup>a</sup>Not observed.

<sup>b</sup>Not assigned.

<sup>c</sup>These resonances are broad and weak.
